# Supplementary material
Source: publisher figshare collection journal article supplement (https://scielo.figshare.com/articles/dataset/_/5772666)
Supplement: Supplementary file 1 [file Table_1.xls]

## Sheet: Table_1
<b>Question- I am able to do…</b>	<b>Grade</b>
Microscopy adjustment	1 to 6
Instrumental handling	1 to 6
Clamp manipulation	1 to 6
Vessels preparation for anastomosis	1 to 6
No tissue damage in the procedure	1 to 6
Complete suture	1 to 6
Perform a micro anastomoses with patency	1 to 6
