# Supplementary material
Source: publisher figshare collection journal article supplement (https://scielo.figshare.com/articles/dataset/_/5772666)
Supplement: Supplementary file 2 [file Table_2.xls]

## Sheet: Table_2
<b>Vessels</b>	<b>Proximal diameter ± SD(mm)</b>	<b>Middle diameter ± SD(mm)</b>	<b>Distal diameter ± SD(mm)</b>
Artery	3.9 ± 0.7	3.3 ± 1.4	2.0 ± 0.42
Vein	5.04 ± 1.44	3.5 ± 0.9	2.4 ± 0.82
