# Supplementary material
Source: publisher figshare collection journal article supplement (https://scielo.figshare.com/articles/dataset/_/5772666)
Supplement: Supplementary file 3 [file Table_3.xls]

## Sheet: Table_3
<b>Trainee level</b>	<b>Before</b>	<b>After</b>
Beginner 1	26/42 (62%)	37/42 (88%)
Beginner 2	25/42 (60%)	37/42 (88%)
Intermediate	36/42 (86%)	42/42 (100%)
